## EUROPACE 2007

24–27 June 2007, Lisbon, Portugal

Abstracts selected for presentation at EUROPACE 2007 Congress

|                                |      |
|--------------------------------|------|
| Welcome                        | v    |
| Abstract statistics by topic   | vi   |
| Abstract statistics by country | viii |
| Abstract review committee      | ix   |

### SUNDAY, 24 JUNE 2007

---

#### Oral Sessions

|                                                  |      |
|--------------------------------------------------|------|
| Clinical research YIA oral session. YIA Clinical | iii1 |
| Basic research YIA session. YIA Basic            | iii3 |
| Cardiac pacing in atrial fibrillation            | iii4 |
| Electrocardiogram diagnostics                    | iii5 |
| Cardiac arrhythmias in structural heart disease  | iii7 |
| New developments in pacing leads                 | iii9 |

### MONDAY, 25 JUNE 2007

---

#### Oral Sessions

|                                                             |       |
|-------------------------------------------------------------|-------|
| Experimental studies on arrhythmia mechanisms               | iii12 |
| Epidemiological and clinical aspects of atrial fibrillation | iii14 |
| Syncope: Pathophysiology and treatment                      | iii16 |

#### Poster Session 1

|                                                                           |       |
|---------------------------------------------------------------------------|-------|
| Moderated Posters I – Cardiac Pacing                                      | iii19 |
| Atrial Fibrillation: clinical and epidemiological aspects                 | iii22 |
| Clinical Pacing                                                           | iii26 |
| Catheter ablation of atrial fibrillation. Surgery for atrial fibrillation | iii34 |
| Pacing                                                                    | iii42 |
| Mechanisms of atrial fibrillation                                         | iii46 |
| Antiarrhythmic drugs                                                      | iii49 |

#### Oral Sessions

|                                                                |       |
|----------------------------------------------------------------|-------|
| Extension of indications for cardiac resynchronisation therapy | iii52 |
| Mechanisms of atrial fibrillation                              | iii54 |
| Evaluation of patients with syncope                            | iii56 |
| New aspect of cardiac resynchronisation therapy treatment      | iii58 |
| Remodelling, stunning and metabolism in atrial fibrillation    | iii60 |
| Clinical aspects of cardiac pacing                             | iii62 |

#### Poster Session 2

|                                                                                 |       |
|---------------------------------------------------------------------------------|-------|
| Moderated Posters II – Major issues in cardiac resynchronisation therapy        | iii65 |
| New indication for cardiac resynchronisation therapy and prediction of response | iii68 |
| Technical aspects of cardiac resynchronisation therapy device implantation      | iii73 |
| Optimization of cardiac resynchronisation therapy after implant                 | iii76 |
| Haemodynamic assessment of cardiac resynchronisation therapy                    | iii78 |
| Atrial fibrillation and cardiac resynchronisation therapy                       | iii83 |

*Contents*

|                                                                                     |       |
|-------------------------------------------------------------------------------------|-------|
| Arrhythmic risk and mortality factors in cardiac resynchronisation therapy patients | iii85 |
| Non invasive cardiac arrhythmic assessment                                          | iii88 |

**Oral Sessions**

|                                                                        |       |
|------------------------------------------------------------------------|-------|
| Cardiac resynchronisation therapy in patients with atrial fibrillation | iii94 |
| Antiarrhythmic treatment in atrial fibrillation                        | iii96 |
| Electrocardiogram based risk stratification                            | iii97 |

**TUESDAY, 26 JUNE 2007**

---

**Oral Sessions**

|                                                            |        |
|------------------------------------------------------------|--------|
| Tricks for left ventricular lead implantation              | iii99  |
| Catheter ablation in patients with atrial fibrillation (I) | iii100 |
| Safety issues in implantable devices                       | iii102 |

**Poster Session 3**

|                                                         |        |
|---------------------------------------------------------|--------|
| Moderated Posters III – Pacing, varia                   | iii105 |
| Clinical mechanisms of arrhythmias                      | iii108 |
| Implantable cardiac defibrillator: Technical aspects    | iii111 |
| Cardiac arrhythmias, non invasive                       | iii115 |
| Autonomic                                               | iii116 |
| Electrocardiogram                                       | iii120 |
| Implantable cardiac defibrillator: Secondary prevention | iii125 |
| Implantable cardiac defibrillator                       | iii128 |
| New developments in pacing leads                        | iii132 |

**Oral Sessions**

|                                                                                                             |        |
|-------------------------------------------------------------------------------------------------------------|--------|
| How to predict cardiac resynchronisation therapy response. An unsolved issue.                               | iii137 |
| Catheter ablation in patients with atrial fibrillation (II)                                                 | iii139 |
| Remote monitoring for patients with implantable cardiac defibrillator.                                      | iii141 |
| Programming of atrioventricular and interventricular intervals of cardiac resynchronisation therapy devices | iii143 |
| A closer look at supraventricular arrhythmia                                                                | iii145 |
| Primary prevention of sudden death by implantable cardiac death (I)                                         | iii147 |

**Poster Session 4**

|                                                                                                                |        |
|----------------------------------------------------------------------------------------------------------------|--------|
| Moderated Posters IV – Non-atrial fibrillation ablation and arrhythmia mechanisms and autonomic nervous system | iii150 |
| Syncope: Prognosis                                                                                             | iii152 |
| Syncope: Treatment                                                                                             | iii153 |
| Pacing: indications                                                                                            | iii153 |
| Pacing: Devices                                                                                                | iii155 |
| Syncope: Diagnosis                                                                                             | iii160 |
| Tools to enhance mapping and ablation                                                                          | iii164 |
| Ablation of accessory pathway, supraventricular tachycardia in children and adults                             | iii166 |
| Ablation of ventricular arrhythmias                                                                            | iii168 |
| Ablation of atrioventricular mode reentry tachycardia                                                          | iii170 |
| Ablation of flutter and macroreentry tachycardia                                                               | iii172 |
| Human electrophysiology                                                                                        | iii174 |
| Basic and animal electrophysiology                                                                             | iii177 |
| Invasive diagnostic electrophysiology                                                                          | iii180 |

**Oral Sessions**

|                                                                            |        |
|----------------------------------------------------------------------------|--------|
| Follow up and prognosis in patients with cardiac resynchronisation therapy | iii182 |
| Mapping and ablation of cardiac arrhythmias                                | iii184 |
| Primary prevention of sudden death by implantable cardiac defibrillator    | iii186 |

**WEDNESDAY, 27 JUNE 2007**

---

**Oral Sessions**

|                                                                           |        |
|---------------------------------------------------------------------------|--------|
| Effects of right ventricular pacing on left ventricular function          | iii188 |
| Long-term perspectives in arrhythmia management                           | iii190 |
| Secondary prevention of sudden death by implantable cardiac defibrillator | iii192 |
| Optimizing pacing                                                         | iii193 |
| Catheter ablation of ventricular arrhythmias                              | iii195 |

|                     |        |
|---------------------|--------|
| <b>Author Index</b> | iii198 |
|---------------------|--------|

|                    |        |
|--------------------|--------|
| <b>Topic Index</b> | iii211 |
|--------------------|--------|
